# Supplementary material
Source: MDPI journal article supplement (https://www.mdpi.com/2072-4292/11/21/2490)
Supplement: s1 [file s1]

## Sheet: data
	ANALYTICAL CONCENTRATION (mg/kg)											XRF CONCENTRATION - SCANNER 1 (mg/kg)											XRF CONCENTRATION - SCANNER 2 (mg/kg)											XRF CONCENTRATION - SCANNER 3 (mg/kg)											SOIL PROPERTIES				EXTRA INFO
sample	Pb	Cd	As	Zn	Cu	Ni	Fe	Mn	Cr	Ca	K	Pb	Cd	As	Zn	Cu	Ni	Fe	Mn	Cr	Ca	K	Pb	Cd	As	Zn	Cu	Ni	Fe	Mn	Cr	Ca	K	Pb	Cd	As	Zn	Cu	Ni	Fe	Mn	Cr	Ca	K	clay (wt%)	CaCO3 (wt%)	pH-KCl (-)	OC (wt%)	country
1	24	15		276	471	46	41755.7	3639.95	52	15008.5	4731.84	15		8	71.6667	917	11.3333	48455.7	4210.33	13	21291.6	6641.74	10.3333		14	106	1175.33	66	41491.3	3608	58	14533.3	3512	17.3333		10.6667	96	1368.67	22.3333	52152.3	4932	74.6667	20081	7153.33					1
2	28			520	511	45	37769	3949.73	50	12292.7	5063.9	15		5.33333	107.667	982	10	41015.3	3929		12960.2	6964.11	12.6667		12	159.333	1309	71.6667	37799.7	3761.67	49.6667	8481.33	4361	16.6667		8	136.333	1395.33	28.3333	44348.3	4689.67	64	12094.3	7457.33					1
3	18			324	444	46	36789.8	619.566	49	1143.51	5063.9	14		4.66667	56.6667	870	8.5	41574.7	808		1800.78	7157.81	9.66667		11.3333	86.6667	1193.67	49.6667	37606	696.667	39.3333		4119.67	13.6667		9	74.6667	1286.33	27.6667	43974	1047	33	1329.33	6806.67					1
4	12			282	410	46	37279.4	309.783	50	714.691	4897.87			7.66667	40.3333	809.667	4.5	39767.7	388		1160.42	7102.19	9		11.6667	67	1132.67	43	37709	315.333	37.3333		4266	12.3333		9.33333	53.3333	1172.33	26	42779	656.333	44.6667	1081	6562.67					1
5	21			543	402	46	37838.9	1161.69	54	857.629	4897.87	18		7.33333	39.6667	812	16	42195	1363.67		1411.28	7216.47	10		11.3333	62	1091.33	50.6667	37889	1184	52		4011.67	14.6667		8.33333	49.3333	1176	29	43754	1678	45.6667	1238	6730.67					1
6	18			382	400	47	37419.3	1471.47	54	1286.44	4731.84			5.66667	29	740	7	39579.3	1545.33		2059.5	6914.02	9		11.3333	46	1033.67	56	36592.7	1355.33	44.6667		3881.67	13		9	35	1121	28	42973	2068.67	41.6667	1374	7083.33					1
7	12			63	395	46	37209.4	1316.58	53	1286.44	4731.84	14		4.33333	26.3333	780		40979	1578		2156.46	7024.71	8.66667		11.3333	43.6667	1060	54	36370.3	1404	40		3780	14		8	35.6667	1158.67	24.3333	43236.7	2000.33	43.6667	1493	7053					1
8	24			64	400	46	36440.1	1316.58	50	1143.51	4731.84			6	23	753	11	40600.3	1474.33		1900.36	7125.99	7.66667		11	41.6667	1030.67	50.6667	35932	1288.67	44		3837	12.3333		9.33333	30	1143.33	28.3333	43868	1895.33	49	1565.67	7189					1
9	35			84	321	41	34411.7	232.337	63	2644.36	3237.58	15		5.5	41.6667	243.333	19	38732	256		4114.95	4345.27	9.66667		9.33333	67.3333	343	53.6667	34230	200.333	24		909.333	16.3333		7	65.6667	383.333	59.3333	42229.7	706	44.6667	2918.67	5983.33					1
10	33			67	344	44	34761.4	542.12	66	1357.91	2988.53			3.5	27	273.667	20.3333	38291	587.333		2136.69	4243.72	10.3333		9.66667	47.3333	394	60.6667	34431	532.333	30.6667		794.667	18.3333		4.33333	43	433.667	54.3333	42023.3	1002	24.6667	1247	6075					1
11	23			77	155	48	50008.9	2788.05	49	50886	5146.92	18		13.6667	51	664	20.3333	56479.7	2906.33		55845.9	7377.25	14.3333		23.6667	75.3333	785.667	107.667	47943	2627	56	44497.3	4391	20.6667		24	71.3333	921.667	34.3333	61299	3819.33	84.3333	54906	8272.67					1
12	26			65	171	47	50358.6	2555.71	48	24799.8	6392.14	23		12.6667	31.3333	591.333		51852	2197		24818.1	8740.9	16.3333		21.6667	48.6667	789.333	98	46283.7	2023	67.3333	17851.3	5634.33	22		19.6667	42	898.667	33.6667	56783.7	2954.67	88.3333	23764.3	9285					1
13				53	22	29	15946.9	309.783	96	2287.01	15108.7	18		13.3333	50.6667	23	16	30298	578.667	89.3333	3566.31	19358.2	19.3333		13	57.6667	24.3333	32	27904.3	485.333	67.3333		16990	23		9	52.3333	18.3333	29	31617.3	766.333	82.6667	3641.33	13016.3	14.25		3.3	2.1	2
14	17			35		12	17205.9	929.349	81	2287.01	15855.8	37		15	36	15.3333		16708.3	347	72	2681.52	16069.4	45		10.6667	38.6667	14.6667	9.33333	16491.7	293.333	40.3333		14849	41.6667		9.33333	34	11.3333		17161	506.333	65.3333	2834	10784	11.95		3.7	0.76	2
15				38		13	29096.1	542.12	83	3001.7	18097.2	17		10.3333	34.3333	12.3333		16655	972	68.3333	2634.83	16262.3	21		8	38	11.6667	13.3333	15939.7	881	54.6667		14528.7	22			34.6667			17427.3	1183.67	75.6667	2777.67	11220	22.2		3.8	0.16	2
16	33			59		33	21892	387.229	107	4431.08	14942.7			12.3333	36.6667	16.3333	13.5	24404.7	382.333	100	5046.19	15907.6	16		12	42.6667	17	26	22920.3	328	79.6667	1389.33	14199.7	18		9.33333	39.6667	14.3333	26.6667	25239.3	570	103	4923	12813	15.25		4.1	0.12	2
17				40		28	20563.1	309.783	106	41023.3	13863.5			11.6667	33.6667	14.6667	12	22267.3	391.667	87	5170.31	15148.8	15.6667		10.3333	40	18.6667	28	21026.3	348.667	87.6667	1699	13492.7	19.3333		6.66667	36.6667	13.3333	27	23468.7	601.667	98.6667	5071.33	12487.3	14		4.2	0.12	2
18				36	13	22	23570.6	387.229	94	4359.61	15440.7			11	33	14		24155	421	107	53893.6	14620	16.6667		9	37.3333	13.6667	26.6667	20058.3	332.333	78.6667	43158.3	11898	21.3333		6	38	12.3333	27.6667	25211.3	647	101.667	56205.3	17148.3	12.6		6.9	0.1	2
19	34.7667	0.34	13.9	100.25	22.325	22.02	23000	681.5	66.15	39400	15506.7	32.3333		16.3333	96.3333	25.6667	12.5	28055.3	869.667	105.667	48483.7	17567.9	40.3333		15.3333	112.667	26.6667	28.6667	23534.7	724	60.3333	39354	14375.7	44.3333		17	123.333	27.6667	33.6667	29803.7	1164	98.3333	50747	18777.7	18.89	9.403	7.321	1.285	3
20	21.05	0.31	15.2	51.975	13.225	41.18	25033.3	858.75	105.333	7692.5	13466.7	24.6667		15.3333	54.3333	17.3333	32.6667	32438	1198.67	160.333	11346.2	15438.8	25		19	63	16	53.6667	28167.3	992.667	109.667	6964.33	12783.3	29.6667		18.6667	62.3333	15	60.3333	34225	1445	149	10373	14068	19.05	0.7231	6.663	2.557	4
21	2.98667	0.86		7.81	6.565	20.8	6504	44.425	84.66	306.667	464				7	9.33333		9306	95.6667	127.667	2302.26	1471.85	6		2.66667	8	6.33333	16.6667	8558	51.6667	89.6667			6.33333			8		23	9302	303.333	119.667	2030.67	2540.67	9.224	0.1212	4.98	0.8157	5
22	16.65	0.3845	3.4	12.775	7.49333	20.46	6935	64.38	92.7	542.5	6028	21		5.5	14	11.3333		11543.7	138.667	172.667	1271.2	9829.78	22.3333		5	14.3333	7	21.6667	10119	87.6667	131.667		7730.67	20.3333			16.6667		30.6667	11597	367.667	174.667	1291.67	6943.33	5.304	0	4.219	2.909	3
23	249.75	1.33	16.5	392.2	53.1	20.98	25350	286.6	62	37600	12862	228		21	369.667	54.6667	15.5	36241	402.667	108.333	61818.6	15920	258.667		13.3333	419.333	55	25	27786	302.667	80.6667	47088	12100	297.333		24	473.667	66.3333	31.3333	37395	683.333	124	62895.3	17625	13.94	8.688	7.332	3.107	3
24	25.6		16.4	108.333	50.6	82.68	42900	1526	127.75	52575	18077.5	22		14.6667	95	46.3333	72.6667	49226.7	1726.33	157	60730.8	20643.8	28.6667		20.3333	120.333	54.3333	93	41852.3	1504	103.667	49290	16726	32		21	128	53.6667	110	53767.3	2259.33	170.667	61694.7	21121.7	39.21	11.33	7.284	2.866	4
25	21.05	0.14	8.6	58.325	5.315	14.96	21166.7	394.5	62.075	2466.67	7180	17.6667		8.66667	31.6667	18.3333		5936.33	408.333	118.333	6298.81	11052.3	26		7	38.3333	17.6667		5339.33	332	55	2988	9494.33	23		8.33333	39.3333	21.3333		6038.67	647.667	87.6667	5809.33	11246.7	20.34	0	3.901	3.982	4
26	34.725	0.22	14.7	96.85	14.65	33.12	35133.3	981	82.1333	38166.7	19917.5	36.3333		12	112.667	16.3333	4.66667	20464.3	656	79.6667	4946.14	16541.2	46		11	129.333	17	26.3333	19367.3	571.333	64	1407.33	14958.7	46.3333		8.33333	116.667	14.3333	21.6667	21775.7	870.333	84.6667	4843	13243.7	35.39	8.786	7.118	1.769	3
27	85.55	11.9	3.55	179	61.26	35.45	6432	278.2	127.25	4198	7920	114.333		13	283.667	102	37.3333	13330	599.667	318.667	15771.1	9309.55	126.667	14.6667	6	308.667	119.667	60.6667	10806	494	245	10882.3	7443.67	127.667		7.66667	305.667	138	72.6667	12745	870.667	322	13243	10600.3	4.033	0.3178	6.786	2.581	3
28	37.0167	0.12	11	61.95	16.88	44.5333	22866.7	666	101	2620	12092	32		15.3333	61.3333	20.6667	26.6667	28162	895.333	129.333	3990.6	14642.4	42.6667		12.6667	68.3333	20	52.6667	24839.3	699	95.6667	368.667	11939	47		11.6667	68	17	58.6667	29020.3	1140	146.667	4009	11530	21.49	0.2284	3.961	2.965	4
29	9.66167	0.08	2	19.7333	8.41333	11.95	2611.43	73.6333	34.7714	1214	6186.2	16		4.5	24	16		4868	194.333	91	4266.47	8746.16	15.6667		2	26	12	11.6667	4048.67	122	48.3333	1051.67	7168.67	13.6667			27.3333	14.3333	22.6667	4556.67	400.333	86	3836	8919.67	2.49	0.1915	4.71	1.861	3
30	35.4	0.16	14.45	94.7833	18.6	32.0833	32525	858	75.8571	40540	18515	30.6667		14.6667	87.6667	21.6667	22	37329.3	1034.33	117.333	48789.6	21146.9	42		17	101.333	23.3333	37.6667	31501	855	61.3333	39620	17397.3	44.3333		18	104.667	18	45.3333	39988	1464.33	112.667	50469.7	22054	31.1	9.64	7.137	1.716	3
31	37.1	0.58	9.6	104.25	13	20.96	19640	582.8	74.0667	3803.33	16055	26.3333		13	92.3333	15	7.33333	21334.3	706.333	71.3333	4883.48	17115.2	39.6667		10.3333	109.333	19	26	20029.3	604.333	60.3333	1125.33	15259	40		8.66667	100.333	14.6667	26.6667	22215.3	920.667	77.3333	4826.67	13214	13.63	0.3912	5.304	0.9772	3
32	26.75		4.325	23.325	10.0025	14.22	7174	103.667	55.275	900.333	9048.75	26.6667		9.33333	26	15.6667		12883.3	242.333	152.667	2290.11	14718.5	35		7.33333	31.6667	13.3333	17.6667	11459	170.333	85		12550.3	32.3333		7	29.6667	11.6667	23.3333	12771	438.667	130.333	2158	9705.67	4.542	0.4147	4.07	1.432	3
33	20.75	0.26	5.145	9.8375	9.6025	27.475	7560	54.425	83.5	427.75	5216.25	17		10	12.6667	14	12.3333	13931.7	123.333	229.667	1022.72	9796.85	26.6667		6.66667	13	14	31.3333	11810.3	76.6667	157.667		8131	25.6667		8.33333	14.3333	17.6667	44	14129	364.333	200.667	1016.67	6479.33	4.522	0.5543	3.571	5.147	3
34	19.25	0.12	7.17	57.2333	13.1833	24.55	18575	710.75	79.08	3684	11866	20.5		9.66667	52.6667	16.3333	12.3333	20813.7	905	100.667	4718.86	12679.7	24		9.33333	62	18	30.3333	19381.3	799	72.6667	1089.67	10795	24.3333		7.66667	54.6667	14	30.3333	21436	1130.67	103.333	4441.67	10845	14.7	0.4615	5.262	1.771	4
35	24.24	0.535	11.9333	71.3333	17.4857	18.32	16120	240.2	55.8	29640	14247.5	23		13.3333	62.6667	20.3333	4	20578.7	321.333	98	38502.5	16058.7	27.6667		13.3333	73	19	23.3333	17010.7	255	60.3333	29999.7	13316	27.6667		15.3333	74.6667	21.6667	26.3333	20825.7	585	93	39519.7	18044.7	14.74	6.059	7.223	3.243	3
36	243.5	7.32667	37.4333	890.333	129	52.4833	34520	1010.2	245.667	37500	18105	239.667		32.6667	796.667	122.667	40.6667	42635.7	1305.33	268.667	50646.6	22318	270.333		34.6667	944.333	140.667	61.6667	35242.3	1132.33	230.667	39422	18193.3	310		36.6667	1036.33	164.667	70.3333	46388	1863.33	308.667	51598.3	23103.7	19.88	8.965	7.051	5.237	3
37	19.7	0.15	8.44	76.76	29.9	106.6	33150	701.5	175.667	60750	16890	19.6667		7	65.3333	31.6667	98.6667	40399.7	850.667	205.667	73325.6	19534.8	21.6667		12.3333	83.6667	34.3333	133.333	33100	746.333	154	59994	15789	26		12.3333	89.6667	34.6667	156.333	43421.7	1343.67	234.333	77876.7	21662	20.52	14.57	7.546	0.7487	6
38	22.66	0.33	2.7	22.72	5.8375	8.9275	5450	250	42.525	3650	7847.75	24		5	27.6667	10		9535	528	123	11443.6	9818.16	29.6667		4.66667	32.3333	7	9	8135.33	436	49.6667	7643.33	7776.67	27.3333		6	32.6667		18.6667	9262	749.667	96.3333	10271.3	10509	3.816	1.328	6.072	2.13	3
39	80.22	0.64	27.2	230.6	38.64	52.42	51900	452.25	116.75	6807.5	20297.5	75.9348		12.899	145.155	79.6602	23.0238	27997.1	645.379	121.456	38910.7	16973.8	83.3333		28.3333	235	39.3333	60.3333	50145.3	453.333	109.667	3950.33	18322.7	101.667		25.6667	258	41.6667	71	64779.3	834.333	147	7933.33	17872.3	55.72	1.352	4.956	3.499	3
40	9.68	0.11	2.7	19.7	3.414	3.98	3400	96.3667	12.95	4695	7513.25			4	30.3333	9		6466	218	84.6667	17530.2	10621.2	13.3333		4.33333	31.3333	5.66667		5536	159.333	68.6667	12907.3	8794	11.3333			32.3333			6488.33	448.667	74.3333	16500.7	12922.3	2.011	0.7309	7.55	0.7022	3
41	37.275	0.2	12.3	93.8	12.1	24.6	24850	521	71.5333	36925	16716	37		12.6667	82.3333	15	13.6667	29573.7	658	114.667	47062.1	18511.5	43.6667		14	99.3333	18	34	25180	576.667	67.3333	38013	15614.3	45.3333		15.3333	103.333		33.3333	31232.3	1024	104	48939.7	20018.7	25.22	8.432	7.217	2.022	3
42	29.5	0.34	11.8	73.05	26.64	43.8	23950	1084	103.333	12166.7	14818	25.6667		12	65	25.3333	20.3333	29390.3	1419	139.667	17204.3	17660.6	33.6667		14	82	32.6667	53	25346.7	1181.67	100.333	11731.3	14654.3	38.6667		13.6667	79.6667	30	65	30944.7	1754.67	137.667	16507.7	16438.3	21.96	2.754	7.239	1.857	4
43	297.6	8.5	46.35	1085.33	158.25	62.14	39533.3	1072	267	38050	20312	290.333		41	936.667	140.667	50.3333	47843.3	1324.33	287.333	48374.3	23992.4	331.333		40.3333	1129.67	174	77	39442.7	1158.33	230.333	37440.7	19569	377		49	1236	196	78.6667	51527	1808.67	306	48262.7	23538.3	26.72	8.435	6.983	5.944	3
44	39.7		16.35	103.4	25.34	43.525	33175	1258.25	95.7667	7640	19442.5	30.6667		19.3333	85.6667	24.3333	25.6667	35819.7	1337.67	104.667	9514.44	21179	41.6667		18.6667	110.333	28.6667	55	33044.7	1192.33	92	5241.33	18622	45		17.6667	103.333	19	53.3333	38763	1672	119.667	9191	17397	32.42	1.129	6.924	1.338	3
45	22		18.1	31.06	17.2167	21.86	24525	303.5	50.825	127600	22796.7	19		14.6667	45	23.6667	9.33333	32465	375.333	70.3333	150887	30882.9	24.6667		21	61	23	37.3333	25356	322.667	50	127391	23745.3	29.6667		24	67	17	40.6667	35504	791.333	89.6667	164939	32682	33.22	30.76	7.539	1.674	7
46	251.75	1.24	18.1	403	54.68	21.16	25125	281	66.1667	37140	12876.7	230		19.3333	390	50.3333	7.66667	33963.3	369.333	124.667	58291.8	14773.3	257.333		11.3333	441.333	57.6667	31.3333	27163.7	297	65.3333	45695.7	11934.3	277		22	476	69	30.3333	34982.3	661.333	103.333	58692.3	16783.3	13.97	8.508	7.4	3.144	3
47	20.4167		6.115	31.06	13.35	8.456	3927.5	225.5	40.6	2186	8623.2	20		5.66667	33	19.3333		6056.67	420.333	88	6422.93	11072.8	25		7	37.3333	18.6667		5215	323	40.3333	2845	9397.33	23.3333		8	40.3333	21.3333	17.6667	6227.33	646.333	85.6667	6200	11227.7	4.284	0.4156	5.24	2.499	3
48	25.8		4.8	46.44	18.66	6.36	5836	224.667	38.65	3217.5	8947.4	29		5.33333	53.6667	24		8408	354.667	83.6667	8172.01	11776.8	34.3333		6.33333	61	25.3333		7839	271.667	45.3333	5327	10172	31.3333		8	56.3333	25		8720	580.333	82	7482	12004	5.85	0.6189	5.681	2.68	3
49	40.7667	0.479	10.3	152	33.1	37.525	25675	1315	79.1	17120	18732.5	35.6667		10.3333	136	32.6667	19.3333	30063.3	1594.33	113.667	21990.3	22473.2	43.3333		11.6667	160.333	41.3333	47.3333	26393	1418.33	83.3333	16354.3	19441.7	45.6667		11.6667	159.667	38.3333	44	31982.3	1946	108.667	22164.7	20606	22.37	3.119	7.125	1.364	3
50	35.7	0.231	14.2	96.6	19.9	31.725	32375	852.333	75.2	39875	18440	36.6667		13.3333	87	21.3333	22.6667	38007	1051.33	103	50365.7	21351.4	40		17.6667	100.667	23	42.6667	31471.7	866.333	63	40214.3	17533.3	46.6667		17	98.3333	16.6667	45.3333	39324	1392	109.667	50714.3	21583.3	29.75	9.603	7.216	1.706	3
51	27.1667	0.309	11.8	74.02	41.075	42.4667	28900	397	96.5	20675	19362.5	21		9.33333	55.3333	36	21	37328.3	536.333	129.333	30670	24870.7	28		12	70.6667	40	37.3333	27418.7	381	75.3333	20254.7	18381	35		17	84.3333	50.6667	62	39961	797.667	153.667	29163.3	23346	43.23	1.444	6.263	1.512	3
52	43.8667	0.51	11	151.75	32.3	37.6	25725	3834.5	79.6667	17450	19057.5	36		10.3333	136	32.3333	21.6667	29316.3	1403	94.3333	22216.2	22190.4	43		12	159.333	38	42.6667	26029.3	1238	74.3333	16485.3	19322.7	49		10.6667	156	37	43	30862	1787.33	109	22192.3	20536	22.23	3.079	7.12	1.408	3
53	7.77		6.6	16.6667	5.7225	7.77667	8226.67	75.375	17.6	223250	5930.75			6	14.6667	16.3333		14998.7	152	57.3333	351117	7645.38	13.3333		8	21.3333	9.33333	19	8510	85	35.3333	250800	4828	9.33333		8.66667	19.6667		22.6667	11476.3	479.667	37	209685	14829	18.11	54.22	8.204	2.473	7
54	11.5333	0.08	1.7	19.875	6.97	1.765	2240	76.275	10.1	1130.25	6618.5	15		2.66667	26.3333	14.6667		4196.67	190	36.6667	5801.14	8517.59	15		3.33333	30	14		3405.67	133.667		2385.67	7331.67	12.3333			28.6667	14.3333		3620.67	396	32	4340.33	8785	3.213	0.5176	4.543	1.712	3
55	26.9	0.31	18	112.667	43.225	49.575	32700	725.5	96.3333	38975	22080	22.3333		18	99	43.3333	35.3333	39495.3	873.667	123.667	38160.2	27669.4	30		22	123	54.3333	61	34020	750	100.333	30002.7	23141.7	33.6667		26.3333	136.333	51.3333	67	43518.3	1211	139	42093.3	26468.7	31.29	8.349	7.298	4.214	4
56	29.45	0.67	3.4	89.88	21.85	19.8333	3782.5	152.333	74.85	2996.67	8908.25	30.6667		4.66667	119	39.3333	4.66667	6460.67	335	172.667	11061.7	15539.8	37.3333		4.33333	126	37.6667	23.3333	5141.67	248	118.333	6288	12712.7	33.3333		5	125	42	35.6667	6085.67	553.333	160.333	9710	14316	3.752	0.2469	6.143	2.102	3
57	81.1	0.69	30.35	238.25	37.775	56.225	55200	474.667	123.5	6770	20495	70.6667		22.3333	188	29	37.3333	59494	554.333	139.333	8703.74	22936.2	82		30	243.667	41.6667	59.3333	51912.7	466.667	100.667	3915	18806	93.3333		30	250.333	36.3333	67.6667	63994.3	795.667	147	7931.67	17282	57.31	0.4848	4.971	3.659	3
58	84.4	13.9	3.4	179.25	62.775	37.55	6990	292	131.75	4283.33	8143.33	95.6667		5.66667	215.667	76	24.6667	11576.3	548.667	275	13316.4	9107.83	105.667	12.6667	5	242.333	92	50	9575	466.667	184.333	8805.33	7179.67	103.333			233.333	103.667	60.6667	11202.7	843	253.333	11644	10402	4.263	0	5.432	2.61	3
59	17.5		2.5	29	17.7	5.1	3330	95	26	1340	4270	16.3333		2.5	37.6667	24		4860	184.667	88.3333	5053.58	7967.76	19.6667		3.66667	38.6667	27		4389.33	131.667	43.3333	1942.33	6619.67	16.3333		5.33333	38.6667	30		5145	382.667	58.3333	4754.67	8861.33	3.54	0	5.184	1.722	3
60	7		1.5	53	17.3	13	6000	469	111	42900	9370			5	66.6667	28.6667	4.5	12487	308	247.333	102242	11938.9	11		3	77.3333	30.6667	24.3333	9192	238	318.667	78802.3	9064	12			92.6667	37.3333	30.3333	13209.7	723.667	356	113818	15269.3	4.039	10.04	7.739	0.5811	8
61	42.6		11.2	151	32.5	36.3	24500	1310	81.7	16800	18710	37.6667		9	135.333	37.6667	25	29058.7	1576.67	113.667	22296.7	21820.2	44		12.6667	164	42.3333	43.6667	26413.7	1438.33	76.3333	16616.3	19357.7	49.6667		10	156.333	38.6667	47	31294.3	2012.33	104.667	22272	20436.7	21.83	2.716	7.121	1.315	3
62	35.6		25.3	104	19.3	27.2	26200	739	76	35500	15910	28.3333		28.6667	94	22.3333	14.3333	32513	948.333	118.667	43445.1	18199.6	41.6667		28	111	25.3333	32.3333	27089	809.333	77.3333	33832	15248.7	45		31.3333	113.667	23	40	34024.3	1305.33	110	43458.3	19199.7	24.33	7.978	7.216	1.538	3
63	161			194	125	65	24340	387.229	89	11149.2	14029.5	140.333		12	188.333	162.333	40	33862	583.333	143	22691	17170.5	154		11.6667	231.667	209.333	66.3333	26052	441.667	110.667	15422	13635	180.333		11.3333	258.667	256	82.3333	37109	912	132	22411	17330.3	9.66	0.08	6.61	11.15	2
64	146			202	144	76	29166	387.229	93	18081.7	16104.9	83		13.6667	130.333	70.6667	13	27571.7	363.333	103.333	12466.1	14659.6	96		11	149.333	83.3333	30.6667	22537	287	52	7788.67	11956	109.333		7.66667	156.333	97	38	28272.7	580.333	93.6667	11364.7	14103.3	6.89	0.07	7.36	9.527	2
65	139			201	196	60	27697.3	309.783	76	15651.7	13863.5	130		15	183.333	258.667	32.3333	35382	469.667	122	26514.8	16979.6	146.667		11.6667	219.333	310	52.6667	27843.7	361	65	18849.3	13353.7	176		10.3333	242.333	397.667	68.3333	38111.3	754.333	111.333	26134.3	17701.7	2.87	0.26	7.44	9.023	2
66	97			151	128	38	23081	309.783	66	21583.7	12618.2	83.6667		9.33333	143.667	173	12	27478.7	373.667	109.667	33213.3	14852.2	96		9.33333	169	208	34.6667	22472.7	276	48.3333	25314.7	12015.7	108.333			178	241	44	28346.3	592.667	90.3333	34682.3	15967.3	9.46	0.26	7.42	4.75	2
67	250			237	357	58	30285.1	387.229	75	10434.5	11539.1	212.333		14.6667	244.333	430	39	38027	509.667	90	21265.1	14722.9	231.333		12.6667	303.333	550.333	58	26871	340	45	13445.7	10774	312.667			363.333	740	78.6667	39233.7	774	104.667	19313	14986.3	7.29	0.01	6.97	20.68	2
68	79			96	75	34	21472.4	309.783	67	21583.7	12784.3	62.6667		12	95.3333	83.3333	17.3333	29933.3	505.667	94	37558.9	16185.9	73.3333		11.6667	114.667	95.3333	36.6667	24578	392.333	65.6667	28316.3	13146.3	88.3333		11.3333	120	115.667	41	31400	744.667	111	39551	17666	8.27	0.5	7.33	5.089	2
69	104			132	65	36	20912.8	232.337	78	7575.72	13116.3	74.6667		13.3333	118.333	59.3333	10.6667	25135.3	345.667	89	11630.4	14488	91.3333		11	136.667	72	27.6667	22024.3	278.333	49	7706	12402	96.3333		10	136.667	83.6667	36.3333	26621.7	579	91.6667	10724.7	14043.7	15.16	0.01	6.55	5.279	2
70	52			96	58	33	19933.6	232.337	82	14150.9	13697.4	33.6667		8.33333	83	69.6667	8	24873.3	346.667	93.3333	23957.9	14478.6	42.3333		6.66667	95.3333	83.3333	29.6667	20148.3	237.667	65.3333	16986.7	11604	50			100.333	90.6667	35.6667	25514.7	564	100	23399.7	15134	14.6	0.11	7.19	6.052	2
71	147			208	326	53	24270.1	387.229	67	12935.9	10459.9	136		15	213.667	362	33	37581	720	119	18095.7	12788.1	147		14.3333	257.333	470.333	56.3333	26723.7	515	35.6667	10979	9548.67	190.333		14.6667	305.333	626	82	39918.7	1003.33	103.667	15659	13381.7	4.35	0.01	7.26	17.24	2
72	130			161	106	65	24340	309.783	98	14007.9	15025.7	94.3333		12.6667	145.667	138.333	29.6667	28224.7	442.333	133.333	21324.9	16616.2	112		9	167.333	165.667	51.6667	23117.7	348	91.6667	14854.3	13632.7	129		7	181.667	201.333	66	30592	703.667	126.333	20575.7	16450	8.83	0.0694	7.3	7.1336	2
73	327			356	329	64	30634.8	464.675	73	13221.8	10874.9	244.667		10	342	331.667	30.6667	42212	667.667	108	24838.6	13398.6	277.667			402.333	410	52.6667	29686.7	462.333	45	15490	9566.33	369.667		10	497	580.333	81.6667	43585.3	1000	102.667	22121.7	13933.7	7.04	0.05188	7.26	23.7081	2
74	253			180	49	34	17765.4	464.675	78	13793.5	10958	197.667		18.3333	81.3333	131	21.3333	30269.7	558.667	101	69246.2	14699.7	226		8.33333	98	141.667	41.6667	22683.7	440.667	68.3333	53022.3	10996.3	262.333		5	104	173.333	44	30432.3	871.333	127	70049.7	16737	10.4	0.05	6.84	4.858	2
75	241			177	62	32	17345.8	309.783	71	29230.9	10542.9	245.667		8.66667	179	58	13.6667	23337	725.667	105.667	23571.2	13343.5	274.333			202	73	27.3333	18541.3	554	63.6667	16460.3	10464.3	285.333			202.667	81	35	22354.7	947	87.6667	22495.3	13607.7	10.26	0.5	7.44	3.032	2
76	333			322	129	47	31684	542.12	156	18653.4	11705.1	229		11	160.333	75.6667	8	24569.3	459.667	127	63049.1	12877	253		7.33333	186	86	32	19479.7	371.667	55.3333	48413	9890.67	284.667			195.333	98.6667	39	25309.7	774.667	113.333	61660	15222.3	14.81	0.09	7.25	1.757	2
77	201			233	74	40	24410	542.12	99	14365.3	11622.1	364.667		30.6667	327.667	126.333	26.6667	38857.7	763.667	224	39907.4	14602.6	390.333		19.3333	356.667	141.333	43	29918.7	585.667	145.667	28553.3	10840.3	449.333		26.6667	388.667	164.333	52	38193.3	1028	215	36674	15558.3	8.21	0.43	7.31	3.692	2
78	359			232	179	58	49449.4	619.566	83	31160.5	11871.1	304.333		27.3333	193.667	180.333	45	59225	778	140.333	48387.9	14410.8	347.667		19.3333	226.667	204.667	60.6667	47678	613.333	74.3333	36352	10987	401		19	250	244.333	68.3333	63777.3	1041.67	124	45454.7	14939.3	12.94	0.11	7.49	5.358	2
79	240			106	87	45	22101.8	387.229	77	18510.5	12203.2	243.333		17.3333	95.6667	103.333	22.6667	30489	586	103	31911.7	16552	277		9	117	123.333	47	23573.7	437.667	67.6667	22690.3	12531	326.333		11.6667	175.333	180.333	54.6667	41918	911.667	107	35212.3	16030	8.4	0	7.17	4.143	2
80	413			87	116	39	21122.7	387.229	73	32518.4	12120.2	185.667		16.6667	73.3333	115.333	17	27507.3	528.333	103	60812.3	14604	211		8.33333	86	125.667	38	21294.7	408.333	57.3333	47048	11216.7	252.333		8.66667	91.6667	150	42	29436	837.333	100	60900.7	16642	13.72	0.76	7.34	2.935	2
81	53			32	18	13	5875.17	154.892	49	1500.85	8716.55	27.6667		8.33333	27.3333	29.6667		7560.67	213.333	72.6667	3476.49	10814.6	35.3333		5.66667	30.6667	31.6667		6482	146.667			8839	32.3333		5.66667	30	32.3333		6936.33	373.333	38.3333	3044.67	9309.67	4.26	0	4.29	1.283	2
82	54			33		14	5805.23	154.892	36	1500.85	8965.6	28.3333		10	34	28.6667		7759	206.667	70.6667	2752.04	10704.8	40		5.33333	34.3333	29		6807.67	156.667			8818	34.3333		6	31	29.6667		7326.33	402	45.6667	2619.67	8994.67	4.35	0	4.28	1.114	2
83	28			17		15	6294.83	77.4458	44	2072.6	10791.9			3.33333	12.6667	11.3333		8326.33	148.667	51.6667	3414.08	11432.8	12.3333		3.66667	13.3333	10		7372.67	102.667			10173	10			12			7503.33	354.333	51.3333	3251	9641.33	4.97	0	4.37	0.0739	2
84	30			16		15	9442.24	77.4458	41	2287.01	11207	14		4.66667	13.6667	9.33333		14783	124.667	102.667	4465.15	14139.1	12		5.66667	14	8.33333		12835	75.3333	51	522.333	11957.7	11		4	15			12326.7		60.3333	3593.67	10651.3	6.71	0	4.94	0.06991	2
85	29			15	17	14	6085	77.4458	47	2429.95	11705.1			5	14	9.33333		6872.33	101.667	53	3601.8	11989.3	12.3333		2.66667	13.6667	5.33333		6145.33	68.6667	26		10910	10.6667			13			6422		36	3322.33	10147	6.04	0	4.96	0.04223	2
86	26			18		14	5525.46	77.4458	38	2358.48	11373			4	13.6667	9		6347.33	98	87	3435.52	12058.7	12.3333		3	15	6.33333		6045.67	65	37		11396	8.33333			13.3333			5965.67		59.6667	3157.33	9726.67	5.11	0	5.06	0.02761	2
87	94			44	31	19	8393.11	77.4458	43	1572.32	8467.51	85.3333		10	43.3333	53		12155.7	175	87	3345.47	10260.1	96.6667		6.66667	51	63.6667	9.66667	10824	125.667	42.3333	429	8906.33	95.3333		6.66667	49.6667	67		12338.7	382.333	52.3333	3438.67	9578	5.59	0	3.91	3.276	2
88	97			42	23	16	7903.51	154.892	38	1286.44	8965.6	79		9	38.3333	36.3333		10340.7	240	52.6667	2483.31	10892.4	90.6667			42.3333	42	7.66667	8967.67	170.667			8884.67	87.6667			39.6667	42.3333		9853.33	414	47.3333	2347.67	8680.33	4.73	0	3.92	0.8252	2
89	35			29		13	5735.29	154.892	30	1214.97	9048.61	18		3.66667	25	27		7063	232	74.3333	1932.05	10107.9	20.6667		2.66667	28	29.6667		6685.33	185.333			9072.67	16			26	29.6667		7138	437	44	1984.67	8060.67	4.08	0	4.07	0.1227	2
90	56			33	19	16	6854.37	154.892	41	1643.79	9878.76	29.6667		4	21.3333	33		7848	241	57.6667	2608.62	11103.5	38			25.3333	33.6667		6865.67	173			9642.67	32.3333			22	35		7355.67	447.667	39	2553.33	8971.67	3.78	0	4.34	0.1556	2
91	35			21		14	6644.54	154.892	31	1357.91	9463.68	14.5		4.33333	19	16		8024.67	312.667	78.6667	2393.26	10042.6	19.6667		4	19	12		7535	264.333			8949.33	15.3333			19.6667	14.6667		7757.33	500	42.6667	2284	8345.33	4.64	0	4.22	0.09762	2
92	29			14	11	13	5945.12	77.4458	31	1715.26	9629.71			5.5	9.66667	22		7139	127	71.3333	2864	10915.9	8.33333		3.33333	10.6667	24.3333		6397.33	79.3333			9480	8			10.6667	24.6667		6737	324.667	33	2848	9088.33	3.91	0	4.72	0.00872	2
93	187.062	6.7311		57.5956	33.3542	16.5856						126		13.3333	55.3333	20	12.6667	56722.3	576.667	118.333	5616.28	7402.15	132.667		12	60.6667	22	14.6667	41206.7	364	41	3105.67	5415.33	161.333		16.6667	72.3333	36.6667	39.3333	60056.3	776.667	91	4393.33	8509.67					2
94	214.183	5.05633		55.8515	41.069	16.3597						224.667		16	74	34	37	78601	738.333	121.667	7032.8	5149.96	237.333		17.6667	88	39	30	49686.7	450	21.3333	3992.67	3402.67	337.333		37.3333	128.667	71.3333	86.6667	87031.3	1066	102.667	5276.67	7456					2
95	79.717				16.1025							81		10.6667	31	16.6667	5	24747	320.667	87.6667	4012.99	8108.05	90.6667		6.33333	34.6667	15.3333	8.66667	20227	205		1537.67	6578.33	95		6.33333	36.3333	19.6667	20.6667	24916	486.333	64	3376.33	8270.67					2
96	184.44	4.33876		48.2473	34.1711	13.4588						93		8.33333	32.6667	20		32842.7	334	96.3333	4355.33	6155.82	102.333		6.33333	37	17	8	25989.3	225.333		2281	4739.33	109.333		6	38.6667	23	20	31489.3	519	47.6667	2818	7141.67					2
97					4.28257							19.6667		4	9.66667	9.33333		3717	77.6667	83.6667	2209.11	9314.81	22.3333		3	8			3269.67	32.6667			7855.33	20.6667			9.33333			3589	276.333	37.6667	2201.33	7837					2
98	66.6785	3.30921		29.0191	13.0231							41.3333		4	22.6667	10.3333		17198.7	243.333	81.6667	3674.23	7449.47	49			25.6667	6.33333		15525	160.667		1220.33	6381.67	40.3333			20.6667			13969.7	362.333	27.3333	2306.67	7173.67					2
99	76.6451				8.68363							62.3333		5.33333	11.3333	9.66667		6709	100	60	1797.21	8166.99	70			11			6092.33	54.3333			6890.67	61		2.66667	11.6667			6016.67		22.6667	2045.33	7072					2
100	37.1397				7.77236							61		2.66667	34.6667	13.6667		19944.7	335	75.3333	8597.97	6632.88	63.3333			38.6667	9.66667		15458.3	223		5294.67	5610.33	64		5	42	13.6667	17	19535	519.333	41.6667	6130	7968.67					2
101	262.538	7.69504		102.762	57.5514	19.8623						159.667		8.66667	66.3333	25	11	56063.7	565.333	112.333	6925.12	4721.05	176.333			74.3333	26.3333	9.33333	38063	330.333		3927.67	3285.33	243.667		11	110	48.6667	39	63548	843	82.6667	5240.67	6648.33					2
102	115.061	2.92939		33.7134	28.8965							76		11.6667	32.6667	17		24174.3	267.667	69.3333	3104.38	7409.07	94			36.6667	16.3333		20293.3	181.667		746.667	5836	98.3333			39	20.3333	22.3333	25518.7	464.667	43.3333	2782.33	7854					2
103	199.503	6.59765		51.3451	41.0743	19.2655						131.667		8.33333	41.6667	22.3333	16.6667	50205	478.667	87.6667	4206.91	6686.84	145		5.66667	49	23.3333	16	37518	323	24.3333	2146	5113.67	167			58	34	36.6667	51491.3	676.667	78	3090.67	8151.33					2
104	188.2	4.40761		65.572	40.4106	14.6224						102.333		8	46.3333	19.6667	4	39149.7	395.333	77.3333	5493.59	7266.01	112.333		6	54.6667	20.6667		29534.7	263.333		3211	5757.33	133		10	63.6667	29	26.6667	42551.7	634	76	4444.33	8698.67					2
105	56.4979				16.6042							46.3333		6.66667	26.6667	16		18002	253	66.3333	5543.86	8298.71	54.6667			28.6667	14.3333		14368.7	172		2868.33	6986.33	54.6667		8.66667	34.6667	18.3333		18040.3	436.333	62.6667	4610.33	8974.33					2
106					4.78099							18		5.33333	8.66667	8.66667		4654.33	231	49.3333	2336.56	10128.4	23		4	8			4092.67	196.667			8887.33	19			9.33333			4036	407	33.3333	2087	7958.67					2
107	44.5563				9.54648							38.6667		9.33333	25	11		8516	134.333	73.3333	2875.92	8474.7	53.6667			24.3333	6		7949.67	96.6667			7524.67	44			23.3333			7740	342	44.3333	2538.67	7708					2
108	32.1645				7.01356							31.3333		6.5	19	9.66667		10721.7	174	62.6667	2786.82	7615.78	36.6667			19.3333	4.66667		9523.33	122.667			6601.33	32.3333		5	21.6667			9994.33	356	27.3333	2653.33	7454.67					2
109	50.673				12.9486							34		4.5	16.3333	12.3333		8808	147	45	2438.29	7836.87	41			17.3333	5		8103.33	91			6447	35.3333			18			8829.67	339.667	30	2328.67	7171.33					2
110	342.775	4.58012		70.5904	58.437	21.0828						329		16.6667	86.6667	43.6667	36.3333	73331.3	653	117.667	8965.32	6203.14	352.667	9.66667	12	101.333	48.6667	32.6667	44387	365.667	25	4742.33	3952.67	534.333		23.6667	154	86.3333	81.6667	76878	896.333	103.667	6269	8231.33					2
111					3.61655							17		3	8.66667	8.33333		3841.67	75.6667	40.3333	1731.93	9095.65	19.6667		3.33333	6.33333			3360.33	38			7568	17.3333			7.66667			3493.33		23.3333	1765.67	7533.67					2
112	150.492			30.0853	41.4229							134		11.3333	39.3333	28		15468.3	192.667	72.6667	4313.16	7481.85	144.333		8.66667	43	29	9	11972	114.333		1870	6143	151		8.66667	50	36.6667	24	14019.3	355.333	50	3343.67	7864					2
113	82.5949				20.3384							66.3333		5.66667	22	17		11169	154	59.3333	2202.92	8004.28	78			20.3333	10.6667		10371	88			7047.33	67.3333		6	21.3333	15.3333		11219.3	329	33.3333	2104	7536.67					2
114	82.1237				21.2996							46.3333		6.33333	17.6667	13		8539.67	134	54	2224.83	8051.33	55			18.6667	9		7654.33	75			6509.67	52.6667			22.6667	13.3333		9042.67	321.333	34	2300.67	7542.33					2
115	109.478	4.56535		55.8767	23.6746							81		4.66667	48.6667	14	3	33571	512.667	75	9988.76	5979.55	87.6667			56	11		25093.7	338.667		6328.33	4962.67	105		5.66667	70.3333	21.3333	20.6667	36058.3	748.333	54.3333	7898	7910.67					2
116	43			50	20	28	92883.7		207	929.098	40096	19		17.6667	34	12	29	85973	115.333	325.333	2376.35	39229.2			26.6667	37.6667	5.33333	12.6667	83510.3	38	181.667		37529.3			25.3333	40.6667		19.3333	92137		246.667	1664.67	14952.3					2
117	25			19	11	13	17625.5		33					3.5	11.3333	7		20234.7	68	86.6667	2151.7	13760.5	7.33333		4.33333	9.33333			18088	25.6667			11963	8			12			20175.7		50	1911	8998					2
118	1646			942	251	157	58332.1	1006.79	148	26300.6	17184.1	468		34	806.667	236.667	136	58882.3	909	198.667	39873.8	21308.8	544.333		38.3333	1091	301.667	180.333	46810	785	152.333	27635.7	16114	724.667		31.6667	1334.33	388.667	216.333	65143.7	1378.67	209	37916.7	21376	5.1	3.85	7.23		2
119	131			181	66	71	310965	29351.9	578	177744	996.177	117.333	16		161.333	77.6667	72	257735	27718	677.667	230392	429.463	69.3333		20	196.333	31.3333		242720	29574.3	446	215433		61	24.3333	20	220.333	48.6667	44.6667	286895	36379	569.333	205852		4.5	24.2	9.37		2
120	32			47		14	22661.4	697.012	13	13436.2	20587.7			3	21.3333	5		16096.7	591	31.6667	14005.8	23375.9	13.3333		3	26.6667			16132.7	612.333		9864.33	22440.7	11.6667			26			16530	927.667	24.6667	13677.3	20219	0	0.53	8.96		2
121	3876			1797	131	37	29725.6	851.903	537	20011.3	12369.2	1962.33			1579	138.667	25.3333	31263.3	801.667	78.3333	30312.7	12798.7	1956.33	12.3333		1649.67	160.667	28.6667	26529.3	951	418.333	22550.3	10258.3	2096.67	19.6667		1716	186.333	32.3333	33537.7	1641.67	515	28398.3	13871.3	11.7	3.41	7.47		2
122	705			585	447	50	37908.9	5576.09	172	75185.5	9546.7	553		15	538	550.333	32	41280.3	4367.67	154.667	122716	11337.1	595.667			608	538.333	47.6667	30324.7	3639.67	136	94049.7	8055.67	685			701	657.333	63	42061.7	6086.67	191	120121	12692	7.2	14.95	7.83		2
123	212			238	67	43	52037.3	2013.59	99	13722.1	11705.1	123.333		40	209.333	66	23	57335.7	1648.67	122.667	18644.6	12640.1	147.667		36.3333	248.667	78.3333	32.3333	47066.7	1326.67	60.3333	12327.7	9827.67	169.667		37.3333	259.667	94	38.6667	58884.3	2070.33	113.667	15989	12682.3	34	2.11	6.91		2
124	7253			2465	495	41	44413.5	387.229	7177	40951.8	5977.06	6068.33	40.6667		2086.67	351	86.6667	36597.3	366.333		60034.3	4057.21	5845			2338	393	57	34265.7	760.333	4650	37570.3	1688	6739.67	61.6667		2757.33	525.333	49	48442	2534.67	5969	44866.3	5396.67		25.16	9.61		2
125	45			50	43	88	53645.9	697.012	159	6789.56	12784.3	32		2	36.6667	39.6667	65.6667	51458	660.333	70	7990.96	11735.5	39.3333			47.6667	52.6667	88	45233.3	650.667	155	4232	9046.33	38.3333			47	47.6667	98.6667	55243.7	1137.33	175.333	6721.33	12126.3	15.9091		6.78	0.751704	9
126	49			50	48	29	34132	464.675	30	2287.01	29055	23.3333		3	28.3333	42	9.5	35620.7	595		4153.07	28621.6	31			34.6667	49.3333	21.6667	33173.7	538			25554.7	30			34.3333	46.3333	23	38326	971	45.6667	4222	17504.7	15	0.1	4.9	0.77	10
127	46			13		11	4266.5	154.892	18	500.284	42421	25		2	8	7		4579.67	152.667	17.3333	2280.34	37965.4	30.3333			8.33333			3890.33	127.333			35329.7	26			9.66667			4235.67	451	27.3333	2073.67	12790	6	0.21	4.3	1.18	10
128	58			127	155	61	117364	1316.58	41	714.691	8799.57	32.6667			50.3333	128.667	47	98799.3	1256.33		1451.3	10370.2	20.6667		5.66667	69.3333	159	48	89992.7	1053.67			6766.67	24			66.6667	169.667	53.6667	108191	1603	49.3333	1486	8632	41	0	4.5	1.13	10
[truncated: 13 more columns]
